# Supplementary material for: Intra- and Interspecific variation of Amblyomma ticks from southern Africa
Source: Research Square preprint supplement (doi:10.21203/rs.3.rs-3833842/v1), 2024-01-08
Supplement: Supplementary file 1 [file 96143dd845a46ae6eba97742.xlsx]

## Sheet: Angola
Country	Province	species	Sex	Kode	Sequencing
					12S	16S	COI	ITS2		Amblyomma_pomposum_AGO_
Angola	Huila	pomposum	Male	AHC005				✓		Amblyomma_variegatum_AGO_
26		pomposum	Male	AHC006			✓	✓
104		pomposum	Male	AHB003				✓
		pomposum	Male	AHB006			✓	✓
		pomposum	Male	AHB010				✓
		pomposum	Male	AHB011			✓	✓
		pomposum	Male	AHB014				✓
		pomposum	Male	AHB015				✓
		pomposum	Male	AHB020
		pomposum	Male	AHB025
		pomposum	Male	AHB028
		pomposum	Male	AHB030
	Cunene	pomposum	Male	ACX001				✓
		pomposum	Male	ACC001			✓	✓
	Huambo	pomposum	Male	ANC036	reg
		pomposum	Male	ANC040	reg
		pomposum	Male	ANC058	reg
		pomposum	Male	ANC068	reg			✓
		pomposum	Male	ANC116	reg		✓	✓
		pomposum	Female	ANC25
		pomposum	Female	ANC132
		pomposum	Female	ANC128			✓	✓
		pomposum	Female	ANC129			✓	✓
		pomposum	Male	AHT001	reg
		pomposum	Male	AHT004	reg			✓
		pomposum	Male	AHT017	reg			✓
	Moxico	variegatum	Male	AML039	reg		✓	✓
		variegatum	Male	AML081	reg
		variegatum	Male	AML114	reg
		variegatum	Male	AML177	reg		✓	✓
		variegatum	Male	AML222	reg
		variegatum	Male	AML237	reg			✓
		variegatum	Male	AML195	reg
		variegatum	Male	AML201	reg		✓	✓
		variegatum	Male	AML212
		variegatum	Male	AML234
		variegatum	Male	AML100
		variegatum	Male	AML102
				329				✓
		variegatum	Female	AML241
		variegatum	Female	AML249
		variegatum	Female	AML239
		variegatum	Female	AMl245				✓

## Sheet: Mozambique - livestock
Country	Province	species	Sex	Kode	Sequencing
Mozambique	Gaza	hebraeum	Male	MGB238
56		hebraeum	Male	MGB436
224		hebraeum	Female	MGB321			Amblyomma_variegatum_MOZ_
		hebraeum	Male	MGM188			Amblyomma_hebraeum_MOZ_
		hebraeum	Male	MGM076
		hebraeum	Female	MGM122
		hebraeum	Male	MGC004
		hebraeum	Male	MGC162
		hebraeum	Male	MGC209
		hebraeum	Male	MGC234
		hebraeum	Male	MGC257
		hebraeum	Female	MGC301
		hebraeum	Male	MGG285
		hebraeum	Female	MGG085
	Maputo	hebraeum	Male	MMGa034
		hebraeum	Male	MMGa044
		hebraeum	Female	MMGa065
		hebraeum	Male	MMMoa009
		hebraeum	Male	MMMoa106
		hebraeum	Male	MMMoa128
		hebraeum	Female	MMMoa155
		hebraeum	Female	MMMan104
		hebraeum	Male	MMMan245
		hebraeum	Male	MMMag012
		hebraeum	Female	MMMag053
	Inhambane	hebraeum	Male	MIInr018
		hebraeum	Male	MIInr143
		hebraeum	Female	MIInr089
		hebraeum	Male	MIHem011
		hebraeum	Male	MIHem376
		hebraeum	Male	MIHem405
		hebraeum	Female	MIHem332
		hebraeum	Male	MIMas056
		hebraeum	Male	MIMas110
		hebraeum	Male	MIMas273
		hebraeum	Female	MIMas168
		hebraeum	Male	MIIns047
		hebraeum	Female	MIIns065
	Inhambane	variegatum	Male	MIMam027
		variegatum	Male	MIMam070
		variegatum	Male	MIMam092
		variegatum	Male	MIMam099
		variegatum	Male	MIMam259
		variegatum	Male	MIMam293
		variegatum	Male	MIMam315
		variegatum	Male	MIMam323
		variegatum	Female	MIMam018
		variegatum	Female	MIMam123
		variegatum	Female	MIMam331
		variegatum	Female	MIMam337
	Manica	variegatum	Male	MMCup008
		variegatum	Male	MMCup027
		variegatum	Female	MMCup036
		variegatum	Male	MMPen023
		variegatum	Male	MMPen081
		variegatum	Male	MMPen012
		variegatum	Male	MMPen022
		variegatum	Male	MMPen036
		variegatum	Male	MMPen040
		variegatum	Male	MMPen051
		variegatum	Female	MMPen141
		variegatum	Female	MMPen170
		variegatum	Male	MMMac039
		variegatum	Female	MMMac075
	Sofala	hebraeum	Male	MSChi238
		hebraeum	Male	MSChi250
		hebraeum	Male	MSChi296
		hebraeum	Female	MSChi321
		hebraeum	Male	MSChi341
		hebraeum	Male	MSChi027
		hebraeum	Male	MSChi037
		hebraeum	Male	MSChi222
		hebraeum	Male	MSChi228
		hebraeum	Male	MSChi280
		hebraeum	Male	MSChi293
		hebraeum	Male	MSChi298
		hebraeum	Male	MSChi300
		hebraeum	Female	MSChi052
		hebraeum	Female	MSChi286
		hebraeum	Female	MSChi359
	Sofala	variegatum	Male	MSChi003
		variegatum	Male	MSChi020
		variegatum	Male	MSChi025
		variegatum	Male	MSChi063
		variegatum	Male	MSChi064
		variegatum	Male	MSChi083
		variegatum	Male	MSChi150
		variegatum	Female	MSChi183
		variegatum	Female	MSChi200
		variegatum	Female	MSChi203
		variegatum	Female	MSChi220

## Sheet: Mozambique - wildlife
Country	Province	species	Sex	Kode	Sequencing
					12S	16S	COI	ITS2
Mozambique	Sofala	eburneum	Male	MSMun472	✓		✓	✓				Amblyomma_variegatum_MOZ_
16		eburneum	?	MSMun684	✓		✓	✓				Amblyomma_eburneum_MOZ_
64		eburneum	Male	MSMun460	✓	✓	✓	✓
		eburneum	Male	MSMun1012			✓
		eburneum	Female	MSMun493
		eburneum	Female	MSMun599
		eburneum	Female	MSMun635
		eburneum	Female	MSMun1032	✓		✓	✓
				592	✓
				352	✓
		variegatum	Male	MSMun650	✓	✓
		variegatum	?	MSMun727	✓		✓
		variegatum	Male	MSMun825
	Snaaks	variegatum	Male	MSMun264
		variegatum	Female	MSMun780			✓	✓
		variegatum	Female	MSMun297	✓	✓
		variegatum	Female	MSMun451
		variegatum	Female	MSMun907
				182	✓
				286	✓
				667	✓
				MSMun799	✓

## Sheet: Zambia
Country	Province	species	Sex	Kode	Sequencing
					12S	16S	COI	ITS2
Zambia	Western Province	variegatum	Female	ZMS031						Amblyomma_variegatum_ZMB_
24			Male	ZMN078		✓	✓	✓
96			Male	ZMN100	✓	✓	✓	✓
			Male	ZMN141	✓	✓
			Female	ZMN195
			Male	ZML058	✓		✓	✓
			Female	ZML075	✓	✓	✓	✓
			Female	ZML071	✓	✓	✓
	Eastern Province	variegatum	Female	ZPC110		✓
			Male	ZPT013		✓	✓	✓
			Male	ZPT032	✓	✓	✓
			Male	ZPC022	✓	✓	✓
			Male	ZPC025		✓	✓	✓
			Male	ZPC034	✓	✓	✓
			Male	ZPC081		✓	✓	✓
			Male	ZPC108		✓	✓	✓
	Lusaka Province	variegatum	Female	ZLSY053			✓	✓
			Female	ZLC015		✓	✓	✓
			Female	ZLS022
			Female	ZLS026			✓
			Male	ZLS025
			Male	ZLSY010	✓	✓		✓
			Male	ZLSY026	✓	✓	✓	✓
			Male	ZLSY041		✓	✓	✓

## Sheet: South Africa
Country	Province	species	Sex	Kode	Sequencing
					12S	16S	COI	ITS2
RSA	Limpopo	hebraeum		9	✓	✓	✓			Amblyomma_hebraeum_ZAF_
32				15	✓	✓	✓
128				23	✓		✓
				34	✓
				40	✓	✓	✓
				55	✓	✓	✓
				7	✓	✓	✓
				16	✓	✓	✓
	Mpumalanga	hebraeum		M55
				M3	✓		✓
				M56			✓
				M13	✓
				M20
				M28	✓	✓	✓
				M44			✓
				M48	✓
	Gauteng	hebraeum		RSAGR004		✓	✓
				RSAGR010	✓	✓
				RSAGR013			✓
				RSAGR014	✓		✓
				RSAGR021
				RSAGR029		✓	✓
				RSAGR034	✓	✓	✓
				RSAGR042		✓
	KwaZulu-Natal	hebraeum		U20	✓		✓
				U70	✓
				I14	✓	✓
				I29	✓	✓
				I48	✓
				I35	✓	✓
				U10	✓	✓
				U22	✓
				44

## Sheet: Zimbabwe
Country	Province	species	Sex	Kode	Sequencing
					12S	16S	COI	ITS2	Amblyomma_hebraeum_ZWE_
Zimbabwe	Midlands	hebrauem	Male	ZiMS2	✓	✓	✓	✓	Amblyomma_variegatum_ZWE_
34			Male	ZiMK004	✓	✓	✓	✓
136		*	Male	ZiMK006	✓		✓	✓
			Male	ZiMG016	✓	✓	✓	✓
		*	Female	ZiMK009	✓	✓	✓
			Female	ZiMK012	✓	✓	✓	✓
			Female	ZiMK014	✓	✓	X
			Female	ZiMG022	✓	✓	✓	✓
			Female	ZiMG023	X		X	✓
		variegatum	Male	ZiMG017	✓	✓	✓	✓
	Masvingo	hebraeum	Male	ZiMC4	✓	✓	X	✓
			Male	ZiMMw057	✓		✓	✓
			Male	ZiMC027	✓		✓
			Male	ZiMC071	✓	✓	✓	✓
			Female	ZiMC6	✓	✓	✓	✓
			Female	ZiMMw033	Weird	✓	✓	✓
			Female	ZiMC041	✓	✓	✓	✓
			Female	ZiMC090	✓		✓	✓
			Female	ZiMMw028	✓		X
			Female	ZiMC036	X		X
	Mashonaland West	variegatum	Male	ZiMM001	✓	✓	✓	✓
			Male	ZiMM002	✓		✓	✓
			Male	ZiMM003	X		X	✓
			Male	ZiMM004	✓		X	✓
			Male	ZiMM005	✓		X	✓
			Male	ZiMM006	✓	✓	X	✓
			Male	ZiMM007	✓		X	✓
			Male	ZiMM008	✓		X	✓
			Male	ZiMM009	✓		✓	✓
	Matabeleland South	hebraum	Male	ZiMZ012	✓		✓	✓
			Male	ZiMZ049	✓	✓	✓	✓
			Male	ZiMZ078	✓		✓	✓
			Male	ZiMZ100	✓		✓	✓
			Female	ZiMZ029	✓	✓	✓
			Female	ZiMZ059	X		✓
			Female	ZiMZ093	✓	✓	X	✓
			Female	ZiMZ115	✓	✓	✓	✓
			Male	ZiMZ021	X		X
			Female	ZiMZ091	✓	✓	X	✓
			Male	ZiMZ036	X		X
	F		Female	ZiMZ027	X		X	✓
			Female	ZiMZ064	X		X
		variegatum	Female	ZiMZ040	X		X

## Sheet: Sheet1
	GenBank accession numbers for the sequnces used and obtained in this study
				Gene Region/ GenBank Acc. Num.
Sample code	Genus	Epithet	Country of Origin	12S	16S	COI	CytB	ITS2
AHC005	Amblyomma	pomposum	Angola					✓
AHC006	Amblyomma	pomposum	Angola					✓
AHB003	Amblyomma	pomposum	Angola				PP060787	✓
AHB006	Amblyomma	pomposum	Angola			PP047536	PP060788
AHB010	Amblyomma	pomposum	Angola				PP060789	✓
AHB011	Amblyomma	pomposum	Angola			PP047535	PP060790	✓
AHB014	Amblyomma	pomposum	Angola				PP060790	✓
AHB015	Amblyomma	pomposum	Angola			✓	PP060791	✓
ACX001	Amblyomma	pomposum	Angola					✓
ACC001	Amblyomma	pomposum	Angola		PP073791	PP047534		✓
ANC068	Amblyomma	pomposum	Angola				PP060806	✓
ANC116	Amblyomma	pomposum	Angola				PP060807	✓
ANC128	Amblyomma	pomposum	Angola		PP073792			✓
APM1	Amblyomma	pomposum		PP073909			PP060872
APM2	Amblyomma	pomposum		PP073910			PP060873
APM3	Amblyomma	pomposum		PP073911			PP060874
APM4	Amblyomma	pomposum		PP073912			PP060875
APM5	Amblyomma	pomposum		PP073913			PP060876
APM6	Amblyomma	pomposum		PP073914			PP060877
APM7	Amblyomma	pomposum		PP073915			PP060878
APM8	Amblyomma	pomposum		PP073916			PP060879
AML039	Amblyomma	variegatum	Angola			PP047539	PP060798	✓
AML177	Amblyomma	variegatum	Angola			PP047537		✓
AML237	Amblyomma	variegatum	Angola
AML201	Amblyomma	variegatum	Angola		PP073793	PP047538		✓
AML329	Amblyomma	variegatum	Angola					✓
AMl245	Amblyomma	variegatum	Angola					✓
MGB436	Amblyomma	hebraeum	Mozambique			PP047461	PP060809	✓
MGB321	Amblyomma	hebraeum	Mozambique	PP073833	PP073743	PP047460		✓
MGM076	Amblyomma	hebraeum	Mozambique	PP073838		PP047466	PP060815	✓
MGM122	Amblyomma	hebraeum	Mozambique	PP073837			PP060816
MGC209	Amblyomma	hebraeum	Mozambique		PP073744	PP047462	PP060812	✓
MGC301	Amblyomma	hebraeum	Mozambique	PP073834	PP073745	PP047463		✓
MGG285	Amblyomma	hebraeum	Mozambique	PP073835	PP073746	PP047464		✓
MGG085	Amblyomma	hebraeum	Mozambique	PP073836	PP073747	PP047465
MMGa044	Amblyomma	hebraeum	Mozambique	PP073847	PP073750	PP047474	PP060832	✓
MMGa065	Amblyomma	hebraeum	Mozambique	PP073848
MMMoa106	Amblyomma	hebraeum	Mozambique	PP073852		PP047477		✓
MMMoa155	Amblyomma	hebraeum	Mozambique		PP073753	PP047478	PP060838	✓
MMMan104	Amblyomma	hebraeum	Mozambique	PP073851	PP073752	PP047476	PP060833	✓
MMMag012	Amblyomma	hebraeum	Mozambique	PP073849	PP073751	PP047475		✓
MMMag053	Amblyomma	hebraeum	Mozambique	PP073850
MIInr018	Amblyomma	hebraeum	Mozambique	PP073841	PP073748	PP047468	PP060821	✓
MIInr089	Amblyomma	hebraeum	Mozambique	PP073843		PP047469		✓
MIHem405	Amblyomma	hebraeum	Mozambique	PP073840		PP047467	PP060820	✓
MIHem332	Amblyomma	hebraeum	Mozambique	PP073839
MIMas056	Amblyomma	hebraeum	Mozambique			PP047473	PP060827	✓
MIMas168	Amblyomma	hebraeum	Mozambique	PP073846		PP047472		✓
MIIns047	Amblyomma	hebraeum	Mozambique	PP073844		PP047470		✓
MIIns065	Amblyomma	hebraeum	Mozambique	PP073845	PP073749	PP047471		✓
MIMam070	Amblyomma	variegatum	Mozambique	PP073918		PP047544		✓
MIMam099	Amblyomma	variegatum	Mozambique		PP073797	PP047545	PP060824
MIMam293	Amblyomma	variegatum	Mozambique	PP073917		PP047540		✓
MIMam323	Amblyomma	variegatum	Mozambique		PP073795	PP047541	PP060826	✓
MIMam123	Amblyomma	variegatum	Mozambique		PP073794
MIMam331	Amblyomma	variegatum	Mozambique		PP073796	PP047542		✓
MIMam337	Amblyomma	variegatum	Mozambique			PP047543
MMCup008	Amblyomma	variegatum	Mozambique					✓
MMPen081	Amblyomma	variegatum	Mozambique				PP060842	✓
MMPen036	Amblyomma	variegatum	Mozambique		PP073798			✓
MMMac039	Amblyomma	variegatum	Mozambique					✓
MSChi321	Amblyomma	hebraeum	Mozambique	PP073856	PP073756		PP060857
MSChi037	Amblyomma	hebraeum	Mozambique		PP073758	PP047484	PP060847	✓
MSChi222	Amblyomma	hebraeum	Mozambique			PP047479	PP060853	✓
MSChi280	Amblyomma	hebraeum	Mozambique	PP073853	PP073754	PP047480		✓
MSChi300	Amblyomma	hebraeum	Mozambique	PP073855	PP073755	PP047482		✓
MSChi052	Amblyomma	hebraeum	Mozambique
MSChi286	Amblyomma	hebraeum	Mozambique	PP073854		PP047481		✓
MSChi359	Amblyomma	hebraeum	Mozambique	PP073857	PP073757	PP047483		✓
MSChi003	Amblyomma	variegatum	Mozambique		PP073802	PP047548	PP060843
MSChi024	Amblyomma	variegatum	Mozambique		PP073801			✓
MSChi064	Amblyomma	variegatum	Mozambique		PP073803	PP047550	PP060849	✓
MSChi150	Amblyomma	variegatum	Mozambique			PP047546	PP060851	✓
MSChi183	Amblyomma	variegatum	Mozambique		PP073799	PP047547	PP060852	✓
MSChi203	Amblyomma	variegatum	Mozambique	PP073919	PP073800			✓
MSMun472	Amblyomma	eburneum	Mozambique	PP073827		PP047457	PP060864	✓
MSMun606	Amblyomma	eburneum	Mozambique			OQ970564
MSMun628	Amblyomma	eburneum	Mozambique	PP073829		OQ970563
MSMun684	Amblyomma	eburneum	Mozambique	PP073830		PP047459	PP060867	✓
MSMun689	Amblyomma	eburneum	Mozambique	PP073831		OQ970566
MSMun460	Amblyomma	eburneum	Mozambique	PP073826	PP073742	PP047456	PP060863	✓
MSMun1012	Amblyomma	eburneum	Mozambique	PP073822		PP047454
MSMun1026	Amblyomma	eburneum	Mozambique	PP073823		OQ970561
MSMun493	Amblyomma	eburneum	Mozambique
MSMun599	Amblyomma	eburneum	Mozambique
MSMun635	Amblyomma	eburneum	Mozambique
MSMun994	Amblyomma	eburneum	Mozambique	PP073832		OQ970565
MSMun1032	Amblyomma	eburneum	Mozambique	PP073824		PP047455		✓
MSMun1039	Amblyomma	eburneum	Mozambique	PP073825		OQ970562
MSMun592	Amblyomma	eburneum	Mozambique	PP073828		PP047458		✓
MSMun352	Amblyomma	eburneum	Mozambique	PP073926				✓
MSMun650	Amblyomma	variegatum	Mozambique	PP073927	PP073805		PP060866	✓
MSMun727	Amblyomma	variegatum	Mozambique	PP073930		OQ970567	PP060868	✓
MSMun825	Amblyomma	variegatum	Mozambique					✓
MSMun264	Amblyomma	variegatum	Mozambique				PP060861	✓
MSMun780	Amblyomma	variegatum	Mozambique	PP073931		OQ970568		✓
MSMun297	Amblyomma	variegatum	Mozambique	PP073924	PP073804		PP060862	✓
MSMun182	Amblyomma	variegatum	Mozambique	PP073921				✓
MSMun286	Amblyomma	variegatum	Mozambique	PP073923
MSMun667	Amblyomma	variegatum	Mozambique	PP073929
ZMN078	Amblyomma	variegatum	Zambia			PP047558		✓
ZMN100	Amblyomma	variegatum	Zambia	PP073938	PP073809	PP047557
ZMN141	Amblyomma	variegatum	Zambia	PP073939	PP073810
ZML058	Amblyomma	variegatum	Zambia	PP073935				✓
ZML075	Amblyomma	variegatum	Zambia	PP073937	PP073808	PP047556		✓
ZML071	Amblyomma	variegatum	Zambia	PP073936	PP073807	PP047555
ZPC110	Amblyomma	variegatum	Zambia
ZPT013	Amblyomma	variegatum	Zambia		PP073816	PP047564		✓
ZPT032	Amblyomma	variegatum	Zambia	PP073942	PP073817	PP047565
ZPC022	Amblyomma	variegatum	Zambia	PP073940	PP073812	PP047560
ZPC025	Amblyomma	variegatum	Zambia		PP073813	PP047561
ZPC034	Amblyomma	variegatum	Zambia	PP073941	PP073814	PP047562
ZPC081	Amblyomma	variegatum	Zambia		PP073815	PP047563		✓
ZPC108	Amblyomma	variegatum	Zambia		PP073811	PP047559		✓
ZLSY053	Amblyomma	variegatum	Zambia			PP047554		✓
ZLC015	Amblyomma	variegatum	Zambia			PP047551		✓
ZLS022	Amblyomma	variegatum	Zambia
ZLS026	Amblyomma	variegatum	Zambia				PP060914
ZLSY010	Amblyomma	variegatum	Zambia	PP073933	PP073806			✓
ZLSY026	Amblyomma	variegatum	Zambia	PP073934		PP047552		✓
ZLSY041	Amblyomma	variegatum	Zambia			PP047553		✓
9	Amblyomma	hebraeum	South Africa	PP073880	PP073766	PP047504	PP060889	✓
15	Amblyomma	hebraeum	South Africa	PP073873	PP073761	PP047499	PP060890	✓
23	Amblyomma	hebraeum	South Africa	PP073875		PP047501	PP060892
34	Amblyomma	hebraeum	South Africa	PP073876
40	Amblyomma	hebraeum	South Africa	PP073877	PP073763	PP047502	PP060894	✓
55	Amblyomma	hebraeum	South Africa	PP073878	PP073764	PP047503	PP060895	✓
7	Amblyomma	hebraeum	South Africa	PP073879	PP073765		PP060888	✓
16	Amblyomma	hebraeum	South Africa	PP073874	PP073762	PP047500		✓
M55	Amblyomma	hebraeum	South Africa			PP047509		✓
M03	Amblyomma	hebraeum	South Africa	PP073883		PP047507		✓
M56	Amblyomma	hebraeum	South Africa			PP047510		✓
M13	Amblyomma	hebraeum	South Africa	PP073881		PP047505		✓
M28	Amblyomma	hebraeum	South Africa	PP073882	PP073767	PP047506		✓
M44	Amblyomma	hebraeum	South Africa			PP047508		✓
M35	Amblyomma	hebraeum	South Africa		PP073768
RSAGR004	Amblyomma	hebraeum	South Africa	PP073860		PP047490		✓
RSAGR010	Amblyomma	hebraeum	South Africa	PP073861
RSAGR013	Amblyomma	hebraeum	South Africa	PP073859
RSAGR014	Amblyomma	hebraeum	South Africa	PP073862		PP047486	PP060898	✓
RSAGR021	Amblyomma	hebraeum	South Africa
RSAGR023	Amblyomma	hebraeum	South Africa			PP047487
RSAGR029	Amblyomma	hebraeum	South Africa			PP047488	PP060900	✓
RSAGR034	Amblyomma	hebraeum	South Africa	PP073863	PP073759	PP047489		✓
RSAGR039	Amblyomma	hebraeum	South Africa	PP073864
RSAGR011	Amblyomma	hebraeum	South Africa			PP047485		✓
RSAGR042	Amblyomma	hebraeum	South Africa
U20	Amblyomma	hebraeum	South Africa	PP073867		PP047493	PP060886	✓
U70	Amblyomma	hebraeum	South Africa	PP073872		PP047498	PP060887	✓
I14	Amblyomma	hebraeum	South Africa	PP073866	PP073760	PP047492		✓
I29	Amblyomma	hebraeum	South Africa	PP073869		PP047495		✓
I48	Amblyomma	hebraeum	South Africa	PP073871		PP047497		✓
I35	Amblyomma	hebraeum	South Africa	PP073870		PP047496		✓
U10	Amblyomma	hebraeum	South Africa	PP073858		PP047491	PP060885	✓
U22	Amblyomma	hebraeum	South Africa	PP073868		PP047494		✓
ZiMS2	Amblyomma	hebraeum	Zimbabwe	PP073898	PP073784	PP047525	PP060909	✓
ZiMK004	Amblyomma	hebraeum	Zimbabwe	PP073895	PP073778	PP047520		✓
ZiMK006	Amblyomma	hebraeum	Zimbabwe	PP073896	PP073779	PP047521		✓
ZiMG016	Amblyomma	hebraeum	Zimbabwe	PP073890	PP073774	PP047517		✓
ZiMK009	Amblyomma	hebraeum	Zimbabwe	PP073892	PP073780	PP047522
ZiMK012	Amblyomma	hebraeum	Zimbabwe	PP073893	PP073776	PP047519		✓
ZiMK014	Amblyomma	hebraeum	Zimbabwe	PP073894	PP073777
ZiMG022	Amblyomma	hebraeum	Zimbabwe	PP073891	PP073775	PP047518	PP060907	✓
ZiMG017	Amblyomma	variegatum	Zimbabwe	PP073944	PP073818	PP047566		✓
ZiMC4	Amblyomma	hebraeum	Zimbabwe	PP073885	PP073770	PP047512	PP060904	✓
ZiMMw057	Amblyomma	hebraeum	Zimbabwe	PP073897	PP073783	PP047524		✓
ZiMC027	Amblyomma	hebraeum	Zimbabwe	PP073884	PP073769	PP047511
ZiMC071	Amblyomma	hebraeum	Zimbabwe	PP073888	PP073773	PP047515		✓
ZiMC6	Amblyomma	hebraeum	Zimbabwe	PP073887	PP073772	PP047514	PP060905	✓
ZiMMw033	Amblyomma	hebraeum	Zimbabwe		PP073782	PP047523		✓
ZiMC041	Amblyomma	hebraeum	Zimbabwe	PP073886	PP073771	PP047513		✓
ZiMC090	Amblyomma	hebraeum	Zimbabwe	PP073889		PP047516		✓
ZiMMw028	Amblyomma	hebraeum	Zimbabwe	PP073906	PP073781
ZiMM001	Amblyomma	variegatum	Zimbabwe	PP073946	PP073819	PP047567		✓
ZiMM002	Amblyomma	variegatum	Zimbabwe	PP073947		PP047568		✓
ZiMM003	Amblyomma	variegatum	Zimbabwe					✓
ZiMM004	Amblyomma	variegatum	Zimbabwe	PP073945				✓
ZiMM005	Amblyomma	variegatum	Zimbabwe	PP073948				✓
ZiMM006	Amblyomma	variegatum	Zimbabwe	PP073949	PP073820			✓
ZiMM007	Amblyomma	variegatum	Zimbabwe	PP073950				✓
ZiMM008	Amblyomma	variegatum	Zimbabwe	PP073951	PP073821			✓
ZiMM009	Amblyomma	variegatum	Zimbabwe	PP073952		PP047569		✓
ZiMZ012	Amblyomma	hebraeum	Zimbabwe	PP073901	PP073786	PP047528		✓
ZiMZ049	Amblyomma	hebraeum	Zimbabwe	PP073903	PP073788	PP047530		✓
ZiMZ078	Amblyomma	hebraeum	Zimbabwe	PP073904		PP047532
ZiMZ100	Amblyomma	hebraeum	Zimbabwe	PP073899		PP047526		✓
ZiMZ029	Amblyomma	hebraeum	Zimbabwe	PP073902	PP073787	PP047529
ZiMZ059	Amblyomma	hebraeum	Zimbabwe			PP047531
ZiMZ093	Amblyomma	hebraeum	Zimbabwe	PP073905	PP073790			✓
ZiMZ115	Amblyomma	hebraeum	Zimbabwe	PP073900	PP073785	PP047527		✓
ZiMZ021	Amblyomma	hebraeum	Zimbabwe	PP073907
ZiMZ091	Amblyomma	hebraeum	Zimbabwe	PP073908	PP073789	PP047533
	Amblyomma	hebraeum	South Africa	MH751460
	Amblyomma	hebraeum	-	AF150049
	Amblyomma	hebraeum	Eswatini	MZ351123
	Amblyomma	variegatum	Nigeria	JF949801
	Amblyomma	variegatum	-	JF826437
	Amblyomma	variegatum	Sao Tome and Principe	MH781752
	Amblyomma	variegatum	-	HQ856468
	Amblyomma	variegatum	-	HQ856528
	Amblyomma	variegatum	-	HQ856567
	Amblyomma	eburneum	Kenya		KP858494
	Amblyomma	pomposum	Zambia		LC634546
	Amblyomma	pomposum	Zambia		LC634588
	Amblyomma	hebraeum	-		L34316
	Amblyomma	hebraeum	South Africa		DQ159446
	Amblyomma	variegatum	Sao Tome and Principe		MH781753
	Amblyomma	variegatum	Uganda		KY688463
	Amblyomma	variegatum	Zambia		LC634575
	Rhipicephalus	maculatu	Kenya		KP858499
	Amblyomma	eburneum	Kenya			KP862672
	Amblyomma	eburneum	Kenya			KT307490
	Amblyomma	eburneum	Kenya			KT307491
	Amblyomma	hebraeum	Mozambique			JX049262
	Amblyomma	hebraeum	Mozambique			JX049265
	Amblyomma	hebraeum	Eswatini			MZ351131
	Amblyomma	hebraeum	Eswatini			MZ351132
	Amblyomma	hebraeum	South Africa			JX049251
	Amblyomma	hebraeum	South Africa			JX049256
	Amblyomma	variegatum	Camaroon			MK648415
	Amblyomma	variegatum	Guinea-Bissau			KU568508
	Amblyomma	variegatum	Senegal			GU062743
	Amblyomma	maculatu	Kenya			KP862678
	Amblyomma	americanum	USA			NC027609	NC027609
	Rhipicephalus	maculatu	South Africa				NC067928
	Amblyomma	hebraeum	-				AH011482
	Amblyomma	variegatum	-				BK007645
	Amblyomma	hebraeum	South Africa				ON800825
✓	Sequnces obtained but not submitted to GenBank
