# Supplementary material for: Intra- and Interspecific variation of Amblyomma ticks from southern Africa
Source: Research Square preprint supplement (doi:10.21203/rs.3.rs-3833842/v1), 2024-01-08
Supplement: Supplementary file 2 [file 9856770dad25c2628438c377.docx]

**Additional File 1: Text S1**. Collection countries with the provinces, main locations, and the GPS co-ordinates for this study

| Sample Country | Sampling Provinces | Main Locations | GPS locations | |
| --- | --- | --- | --- | --- |
| Latatude (S) | Longatude (E) |
| Angola | Cunene | Chiulo | 16.51886 | 14.84050 |
| Xangongo | 16.77291 | 14.98890 |
| Benguela | Benguela | 15.875966 | 14.079374 |
| Huíla | Chibemba | 15.748619 | 14.059498 |
| MBunda | 15.875966 | 14.079374 |
| Huambo | Caala | 13.14762 | 15.67408 |
| Tchicala | 12.72992 | 16.08131 |
| Moxico | Lucusse | 12.50352 | 20.89781 |
| Mozambique | Maputo | Magude | 25.00420 | 32.73285 |
| Gala | 26.62304 | 32.84057 |
| Moamba | 24.97277 | 32.21438 |
| Manisha | 25.45906 | 32.60032 |
| Gaza | Bilene | 24.84542 | 33.08407 |
| Mabalane | 23.84720 | 32.62291 |
| Chongoene | 24.88339 | 32.81821 |
| Guija | 24.39799 | 32.14991 |
| Inhambane | Inhassoro | 21.59656 | 35.13190 |
| Inharrime | 24.24463 | 35.03220 |
| Hermoine | 23.94058 | 35.09099 |
| Massinga | 23.42132 | 35.39648 |
| Mambone | 21.08917 | 34.94773 |
| 21.12336 | 34.79602 |
| 21.11465 | 34.91785 |
| Manica | Cupenha | 19.44223 | 33.32338 |
| Penhalonga | 18.87350 | 32.77740 |
| Macate | 19.19042 | 33.43880 |
| Sofala | Chaideia | 19.56059 | 34.26601 |
| 19.55215 | 34.36478 |
| 19.48321 | 34.58872 |
| 19.69299 | 34.79889 |
| Mungari | 18.39371 | 35.59856 |
| Zambia | Western | Mongu | 15.38914 | 23.20239 |
| 15.45754 | 23.39825 |
| 15.18766 | 22.83576 |
| Lusaka | Lusaka | 15.46060 | 28.77422 |
| 15.451087 | 27.83406 |
| 15.451087 | 27.83406 |
| Eastern | Petauke | 14.39572 | 31.38466 |
| 14.44079 | 31.38581 |
| 14.35060 | 31.37484 |
| Zimbabwe | Midlands | Gokwe south | 18.316667 | 28.782333 |
| Kwekwe | 18.427710 | 29.387663 |
| Shurugwi | 19.825537 | 30.424108 |
| Masvingo | Chiredzi | 22.27023 | 31.22882 |
| 22.29934 | 31.1418 |
| Mkienezi | 21.21667 | 30.3951 |
| Mashonaland West | Mazokie | 17.083 | 30.696 |
| Matabeleland South | Zvishavane | 20.053 | 29.5997 |
| 20.11234 | 29.9144 |
| 20.0076 | 29.5629 |
| 20.11234 | 29.9144 |
